# Supplementary material for: Micro-patterned polymer brushes by a combination of photolithography and interface-mediated RAFT polymerization for DNA hybridization
Source: Royal Society of Chemistry journal article supplement (doi:10.1039/c5py00923e), 2015-01-01
Supplement: c5py00923e1.pdf [file c5py00923e1.pdf]

Supporting Information for Polymer Chemistry (Article)

## Micro-Patterned Polymer Brushes by a Combination of Photolithography and Interface-Mediated RAFT Polymerization for DNA hybridization

Dilek Cimen, Tuncer Caykara

Department of Chemistry, Faculty of Science, Gazi University, 06500, Besevler, Ankara, Turkey.

Correspondence to: Tuncer Caykara (E-mail: [caykara@gazi.edu.tr](mailto:caykara@gazi.edu.tr))

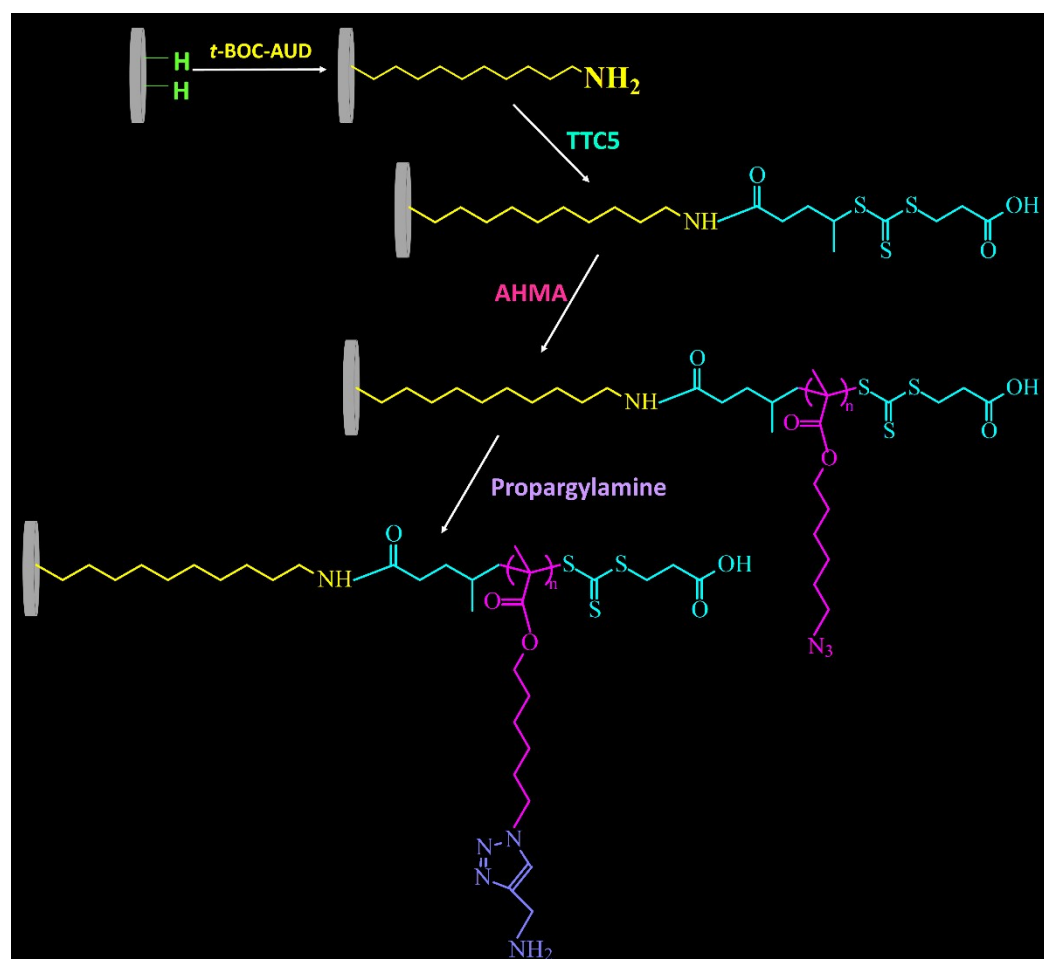

**SCHEME S1** Synthetic routes of the amine functionalized poly(AHMA) brushes
